# Supplementary material for: Antimicrobials, Stress and Mutagenesis
Source: PubMed Central journal article supplement (PMC4192597; doi:10.1371/journal.ppat.1004445), 2014-10-09
Supplement: ppat.1004445.s002.pdf [file ppat.1004445.s002.pdf]

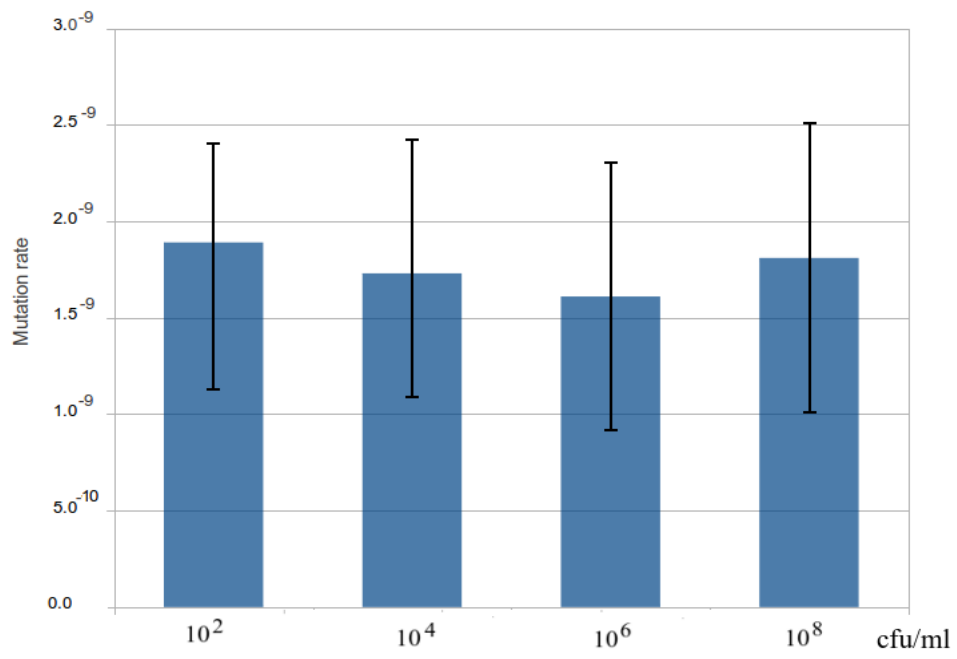

**Figure S2. Rojas et al**
