# Supplementary material for: Antimicrobials, Stress and Mutagenesis
Source: PubMed Central journal article supplement (PMC4192597; doi:10.1371/journal.ppat.1004445), 2014-10-09
Supplement: ppat.1004445.s004.pdf [file ppat.1004445.s004.pdf]

**Table S1.**

| <b>Antibiotic/AMPs</b> | <b>MIC (<math>\mu\text{g/ml}</math>)</b> | <b>MIC<sub>50</sub> (<math>\mu\text{g/ml}</math>)</b> |
|------------------------|------------------------------------------|-------------------------------------------------------|
| Ampicillin             | 4                                        | 3.2                                                   |
| Ciprofloxacin          | 0.125                                    | 0.05                                                  |
| Kanamycin              | 2                                        | 1.6                                                   |
| Cecropin A             | 8                                        | 6                                                     |
| Human lysozyme         | 20                                       | 12.8                                                  |
| LL-37                  | 10                                       | 8                                                     |
| Melittin               | 2                                        | 1.6                                                   |
| Magainin II            | 100                                      | 64                                                    |
| Pexiganan              | 2                                        | 1.6                                                   |
