# Supplementary material for: Antimicrobials, Stress and Mutagenesis
Source: PubMed Central journal article supplement (PMC4192597; doi:10.1371/journal.ppat.1004445), 2014-10-09
Supplement: ppat.1004445.s005.pdf [file ppat.1004445.s005.pdf]

**Table S2.**

| Gene | Assay     | EcoGene Accession Number | Amplicon coordinates within the gene sequence, bp | Amplicon size, bp | Forward primer           | Reverse primer           |
|------|-----------|--------------------------|---------------------------------------------------|-------------------|--------------------------|--------------------------|
| arcA | reference | EG10061                  | 417-481                                           | 65                | CAATGGTTGGGAACTGGACAT    | GCTTGACTGCTCGCCATCA      |
| cpxA | target    | EG10163                  | 935-1001                                          | 67                | AGTTGTGGAGTGAAGTGTGGAT   | ACTGTCAACGACTTGCCCATTT   |
| cpxR | target    | EG10020                  | 561-617                                           | 60                | CAAACGCCTGACGCCTTT       | CGACGCAGGTTGGAAATGT      |
| dinB | target    | EG13141                  | 719-701                                           | 61                | GCATTTTGTGGGAGCGTAGTC    | CGCAACCGTTCGCTGTAA       |
| lexA | target    | EG10533                  | 378-375                                           | 66                | TTCAAGCCGAATGCTGATTC     | CATAATGCCGATATCTTTCATCGA |
| marR | target    | EG11435                  | 77-150                                            | 74                | ATCGCCTGCTTAACGAGTATCTGT | GCGGATAGAGCAGAGCACCTT    |
| mdoG | reference | EG11885                  | 299-357                                           | 59                | CCACCGCAGTCAAACGAAT      | CTGAACATCGCCGAAAGTGA     |
| oxyR | target    | EG10681                  | 83-140                                            | 58                | GCCAGCCGACGCTTAGC        | AACATCACGCCAGCTCATC      |
| phoP | target    | EG10731                  | 171-229                                           | 59                | GGACGGTCTGTCACTGATTCG    | CCAGAATCGGCAGTGAACAT     |
| phoQ | target    | EG10732                  | 1021-1079                                         | 59                | GCCCCACTGCTGGACAAT       | ACCCCTTTCGCTTGATACTT     |
| recA | target    | EG10823                  | 353-331                                           | 61                | ACGCGCTGGACCCAATC        | GAGCACAGCAGGTTGTCGATATC  |
| rpoE | target    | EG11897                  | 216-273                                           | 58                | ATGGCTGTATCGGATTGCTGTAA  | ACGCCCTGAGCAACCA         |
| rpoS | target    | EG10510                  | 456-519                                           | 64                | GACGATTGAACGGCGATTA      | CTTTACGATGTGAATCGGCAAAC  |
| tus  | reference | EG11038                  | 495-563                                           | 69                | CGCCACTTACGCTTTGGTT      | GCCAGGACTTCATCACGATGT    |
| umuC | target    | EG11056                  | 193-254                                           | 62                | TGTGGCGTGGTTGCTTTAG      | ATCACCCGATTGCTCATGTCT    |
